# Supplementary material for: Extratropical circulation associated with Mediterranean droughts during the Last Millennium in CMIP5 simulations
Source: Copernicus journal article supplement (doi:10.5194/cp-19-2511-2023), 2023-12-12
Supplement: Supplementary file 1 [file cp-19-2511-2023-supplement.pdf]

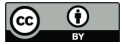

*Supplement of*

## **Extratropical circulation associated with Mediterranean droughts during the Last Millennium in CMIP5 simulations**

**Woon Mi Kim et al.**

*Correspondence to:* Woon Mi Kim ([wmikim@ucar.edu](mailto:wmikim@ucar.edu))

The copyright of individual parts of the supplement might differ from the article licence.

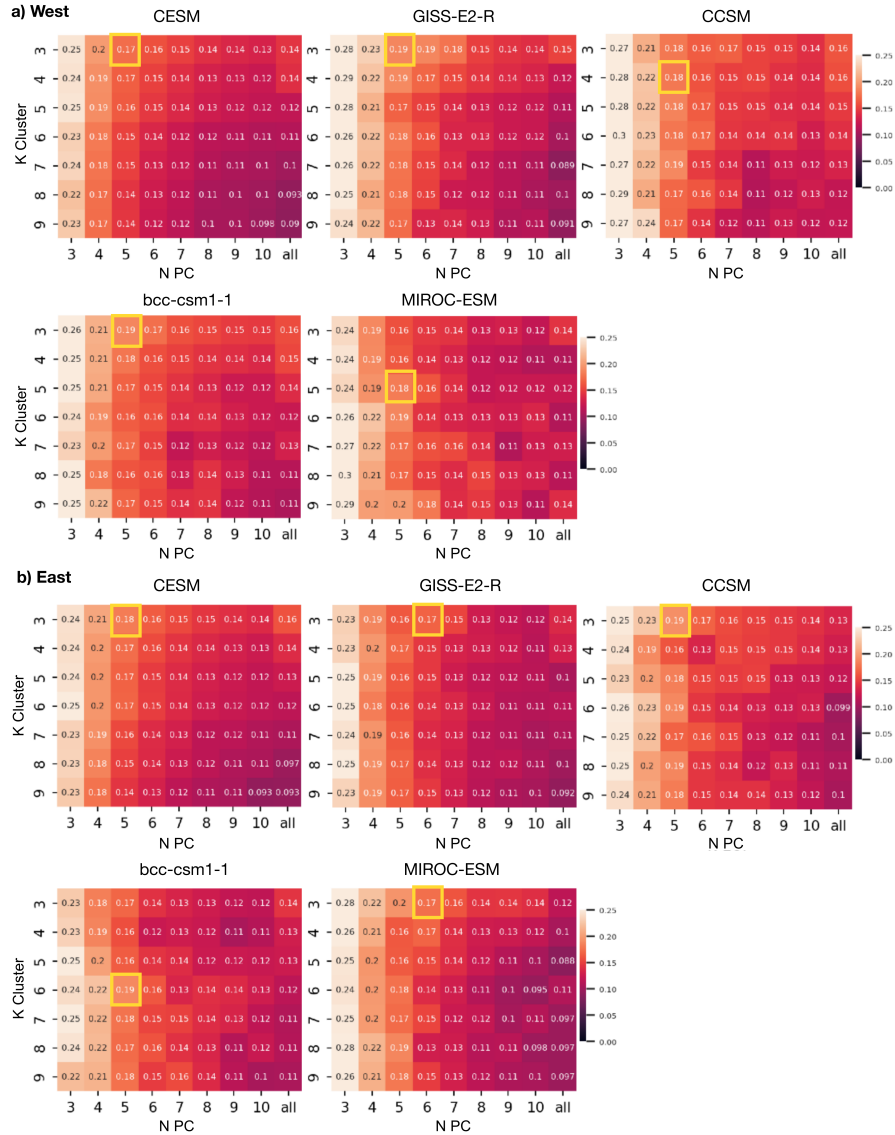

**Figure S1.** Silhouette coefficients ( $S$ ) for a range of  $N$  for PC and  $k$  for KCA for the LM simulations (a) in the western and (b) eastern Mediterranean. Chosen  $S$  is highlighted with a yellow box. *All* indicates the dataset before PCA is applied.

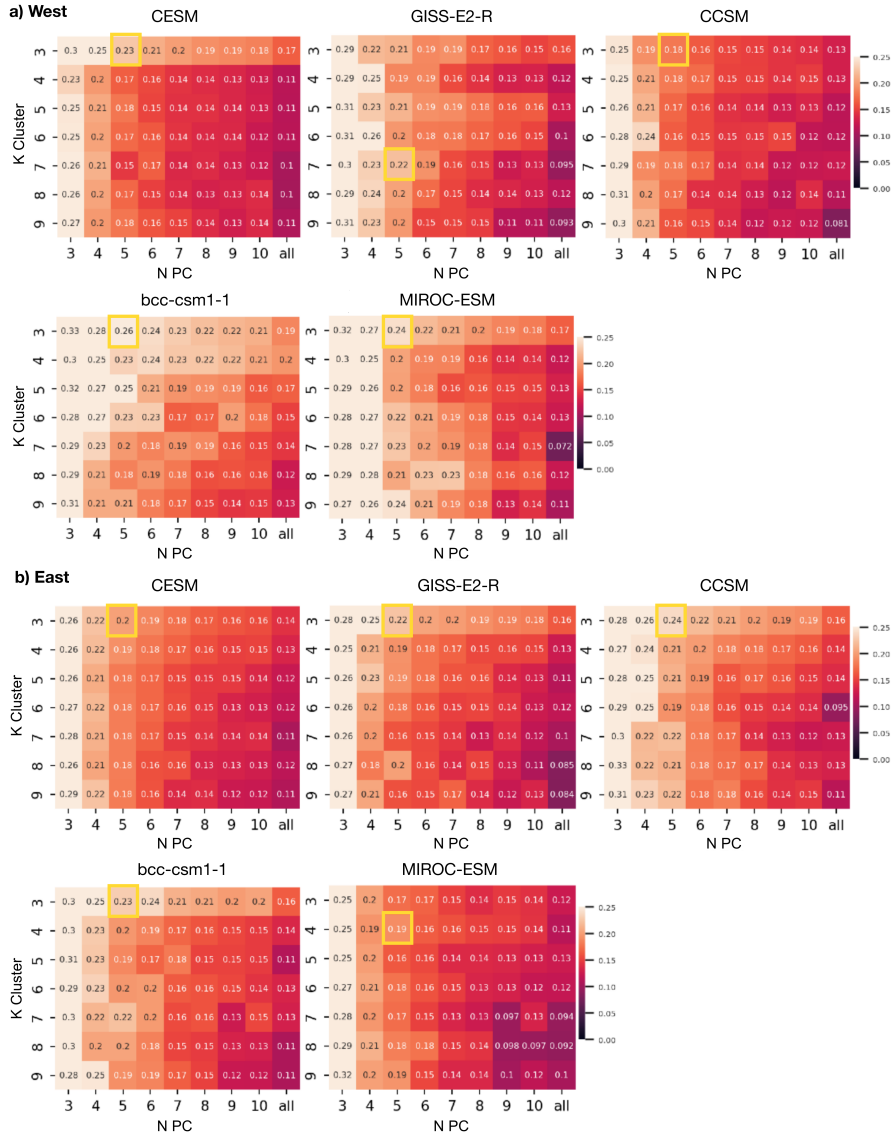

Figure S2. Same as Fig S1 but for the Hist simulations.

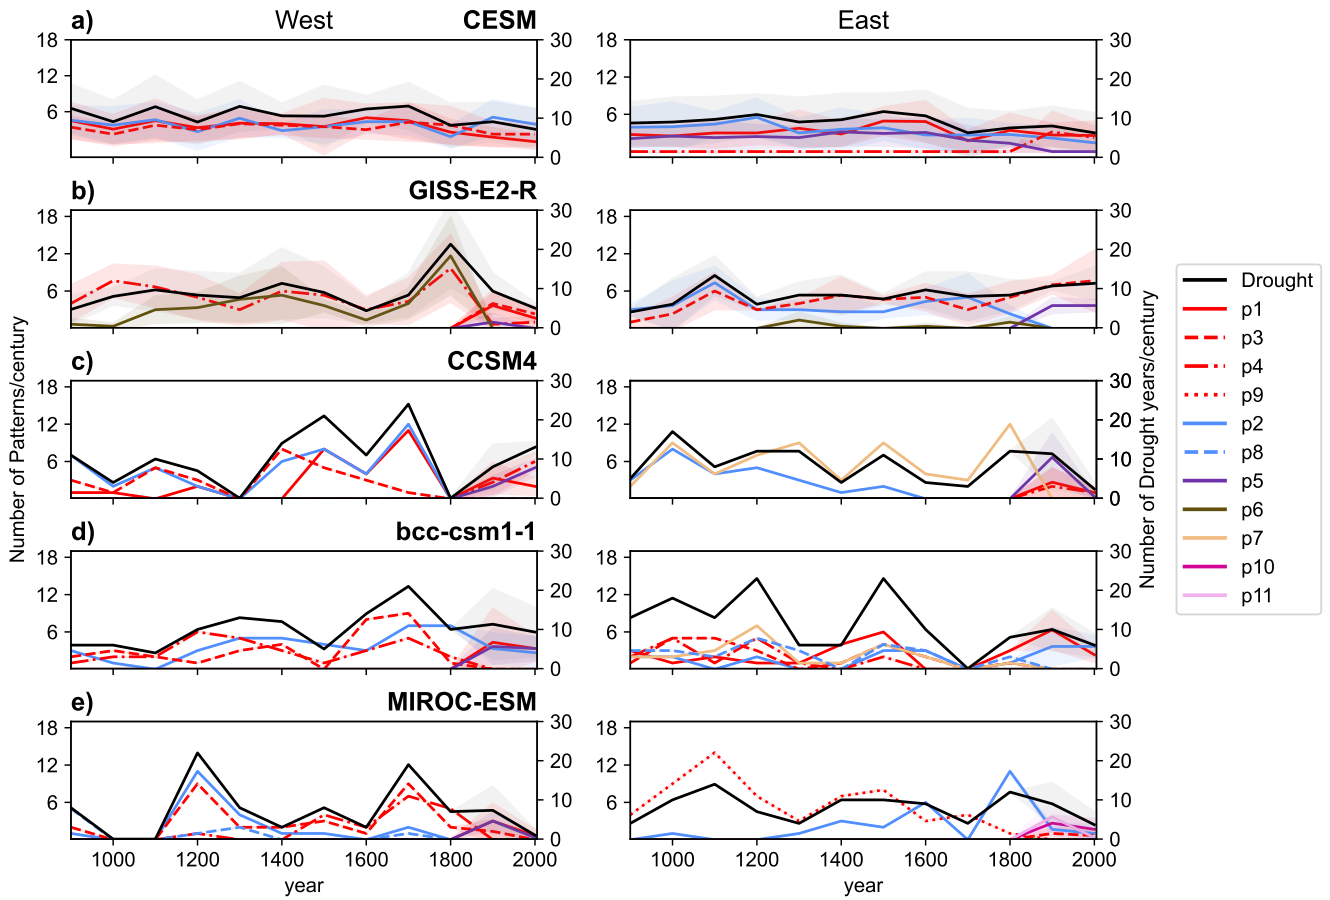

**Figure S3.** Extended version of Fig. 7: occurrence of each pattern group every century for each climate model.
